# Supplementary material
Source: publisher figshare collection journal article supplement (https://gsajournals.figshare.com/articles/dataset/_/13172018)
Supplement: Supplementary file 1 [file 1]

# Supplemental material for 'Local adaptation contributes to gene expression divergence in maize'

Jennifer Blanc<sup>1</sup>, Karl A. G. Kremling<sup>2,3</sup>, Edward Buckler<sup>2,4,5</sup>, and Emily B. Josephs<sup>\*6,7</sup>

<sup>1</sup>Department of Human Genetics, University of Chicago, Chicago, IL

<sup>2</sup>Plant Breeding and Genetics Section, School of Integrative Plant Science, Cornell University, Ithaca, NY

<sup>3</sup>Inari Agriculture, Cambridge, MA

<sup>4</sup>Institute for Genomic Diversity, Cornell University, Ithaca, NY

<sup>5</sup>United States Department of Agriculture-Agricultural Research Service, Robert W. Holley Center for Agriculture and Health, Ithaca, NY

<sup>6</sup>Department of Plant Biology, Michigan State University, East Lansing, MI

<sup>7</sup>Ecology, Evolution, and Behavior Program, Michigan State University, East Lansing, MI

December 24, 2020

---

\*Corresponding author: josep993@msu.edu

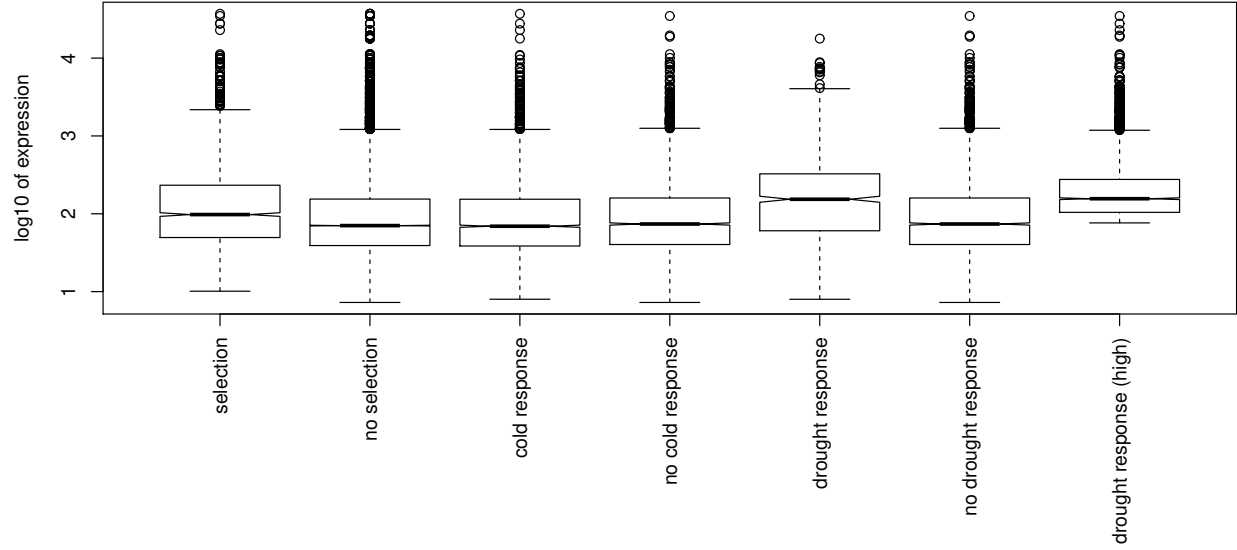

Figure S1: Expression level of genes in different environmental response categories

| Tissue                    | Gene Number | Individual Number |
|---------------------------|-------------|-------------------|
| Kernel                    | 9,814       | 207               |
| Germinating shoot         | 10,195      | 239               |
| Germinating root          | 10,500      | 232               |
| Adult leaf night          | 8,435       | 110               |
| Adult leaf day            | 8,879       | 109               |
| 3 <sup>rd</sup> leaf tip  | 8,489       | 237               |
| 3 <sup>rd</sup> leaf base | 11,555      | 236               |

Table S1: Number of genes and individuals used to test for selection in each tissue

Table S2: A list of all genes that were significant for selection at a  $FDR < 0.1$  level, along with information about whether each gene is drought or cold responsive and information about gene function from a literature search. Because of its size, this table is included in supplemental material as a text file.

| Tissue                    | PC 1 | PC 2 | PC 3 | PC 4 | PC  |
|---------------------------|------|------|------|------|-----|
| Kernel                    | 507  | 331  | 376  | 131  | 116 |
| Germinating shoot         | 106  | 191  | 61   | 123  | 151 |
| Germinating root          | 74   | 153  | 46   | 77   | 92  |
| Adult leaf night          | 345  | 344  | 511  | 257  | 432 |
| Adult leaf day            | 330  | 551  | 293  | 222  | 617 |
| 3 <sup>rd</sup> leaf tip  | 99   | 306  | 88   | 68   | 77  |
| 3 <sup>rd</sup> leaf base | 390  | 352  | 79   | 70   | 91  |

Table S3: The number of genes where  $p < 0.05$  in each of the 7 tissues for the first 5 PCs. Equivalent to Figure 1A with a less stringent significance cutoff.

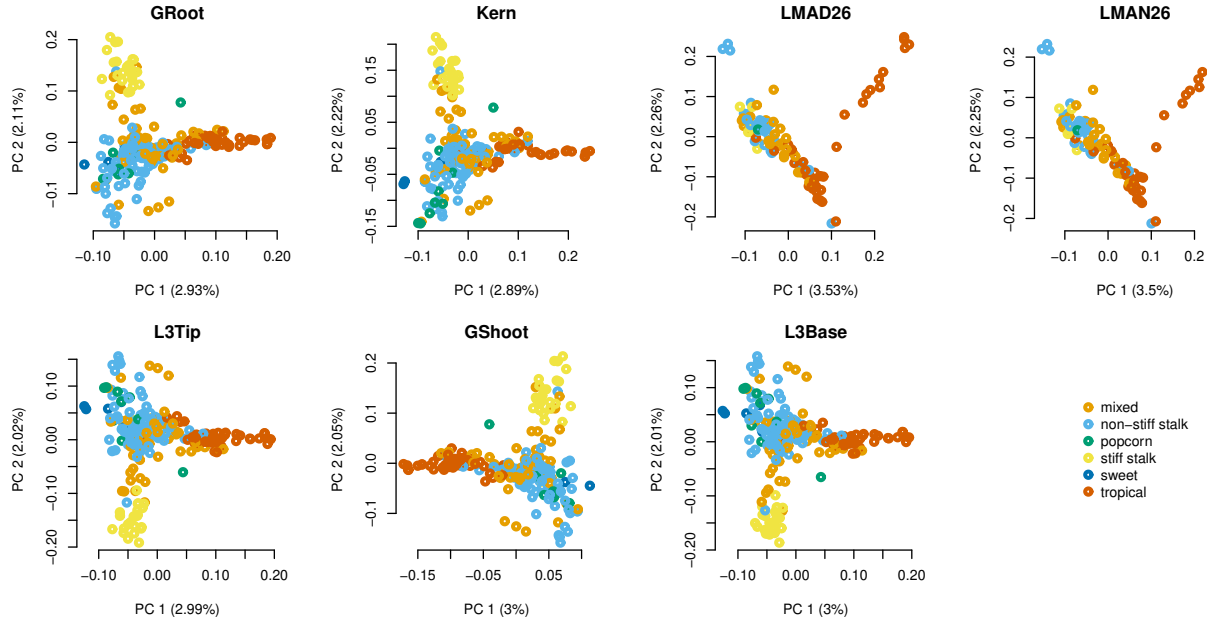

Figure S2: The first two genetic PCs of genotypes in each tissue expression dataset. Each point represents one genotype, colored by subpopulation. The x axis is PC 1 and the Y axis is PC 2, labeled by the percentage of variation that each PC explains.

Table S4: A list of all genes that were significant for selection at a  $p < 0.05$  level. Because of its size, this table is included in supplemental material as a text file.

| Tissue                    | PC 1  | PC 2  | PC 3  | PC 4  | PC 5  | Number of Genes | Cold-Response Genes |
|---------------------------|-------|-------|-------|-------|-------|-----------------|---------------------|
| Kernel                    | NA    | 0.776 | 0.362 | 1.000 | NA    | 9426            | 4741                |
| Germinating shoot         | NA    | 0.882 | NA    | NA    | NA    | 9889            | 5011                |
| Germinating root          | NA    | NA    | NA    | NA    | NA    | 10147           | 5215                |
| Adult leaf night          | 0.699 | NA    | 0.031 | NA    | 0.083 | 8329            | 4251                |
| Adult leaf day            | 0.778 | 0.756 | 1.00  | NA    | 0.004 | 8787            | 4500                |
| 3 <sup>rd</sup> leaf tip  | NA    | 0.771 | NA    | 0.807 | NA    | 8403            | 4279                |
| 3 <sup>rd</sup> leaf base | NA    | 0.785 | 0.817 | NA    | NA    | 11377           | 5830                |

Table S5: Uncorrected p-values and sample sizes for chi-squared test for enrichment of signals of selection in cold-response genes. P-values only shown for PC/tissue combinations with at least 1 significantly selected gene (FDR < 0.1).

| Tissue                    | PC 1  | PC 2  | PC 3   | PC 4  | PC 5      | Number of Genes | Down-Regulated Drought-Response Genes |
|---------------------------|-------|-------|--------|-------|-----------|-----------------|---------------------------------------|
| Kernel                    | NA    | 0.391 | 0.878  | 0.023 | NA        | 3031            | 352                                   |
| Germinating shoot         | NA    | 0.696 | NA     | NA    | NA        | 3450            | 463                                   |
| Germinating root          | NA    | NA    | NA     | NA    | NA        | 3045            | 366                                   |
| Adult leaf night          | 0.083 | NA    | 0.344  | NA    | 0.0000109 | 3605            | 464                                   |
| Adult leaf day            | 0.198 | 0.033 | 0.639  | NA    | 0.000242  | 4065            | 566                                   |
| 3 <sup>rd</sup> leaf tip  | NA    | 0.720 | NA     | 0.451 | NA        | 3735            | 476                                   |
| 3 <sup>rd</sup> leaf base | NA    | 0.034 | 0.5723 | NA    | NA        | 3687            | 511                                   |

Table S6: Uncorrected p-values for chi-squared test for enrichment of signals of selection in down-regulated drought-response genes. P-values only shown for PC/tissue combinations with at least 1 significantly selected gene (FDR < 0.1).

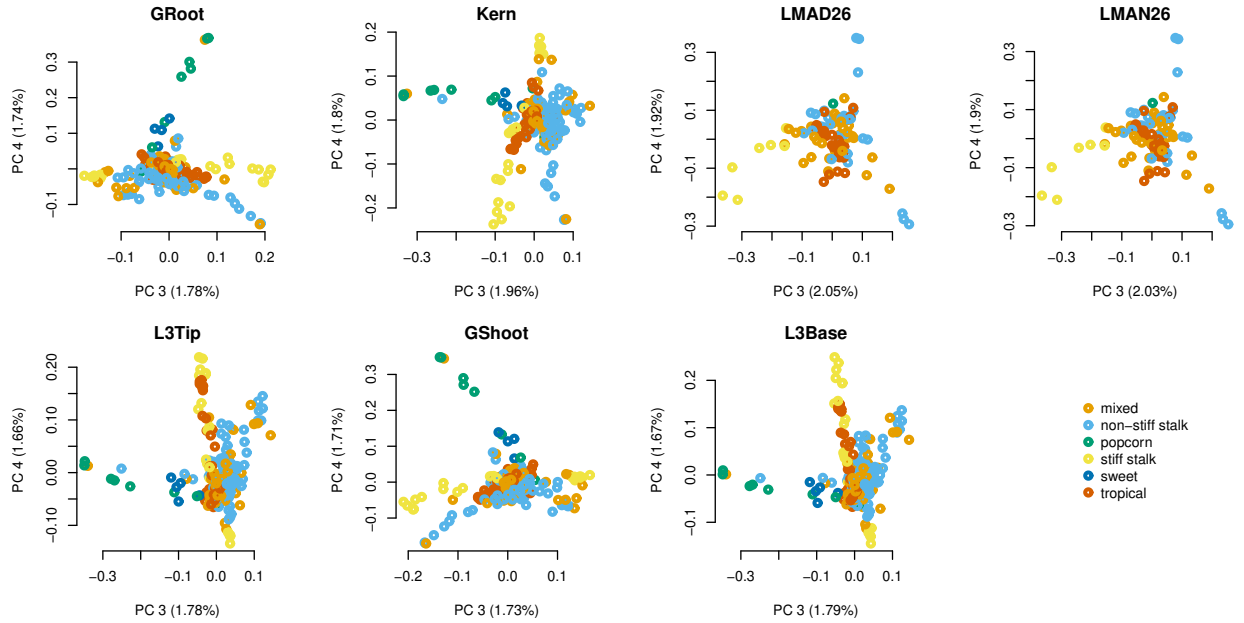

Figure S3: The third and fourth genetic PCs of genotypes in each tissue expression dataset. Each point represents one genotype, colored by subpopulation. The x axis is PC 3 and the Y axis is PC 4, labeled by the percentage of variation that each PC explains.

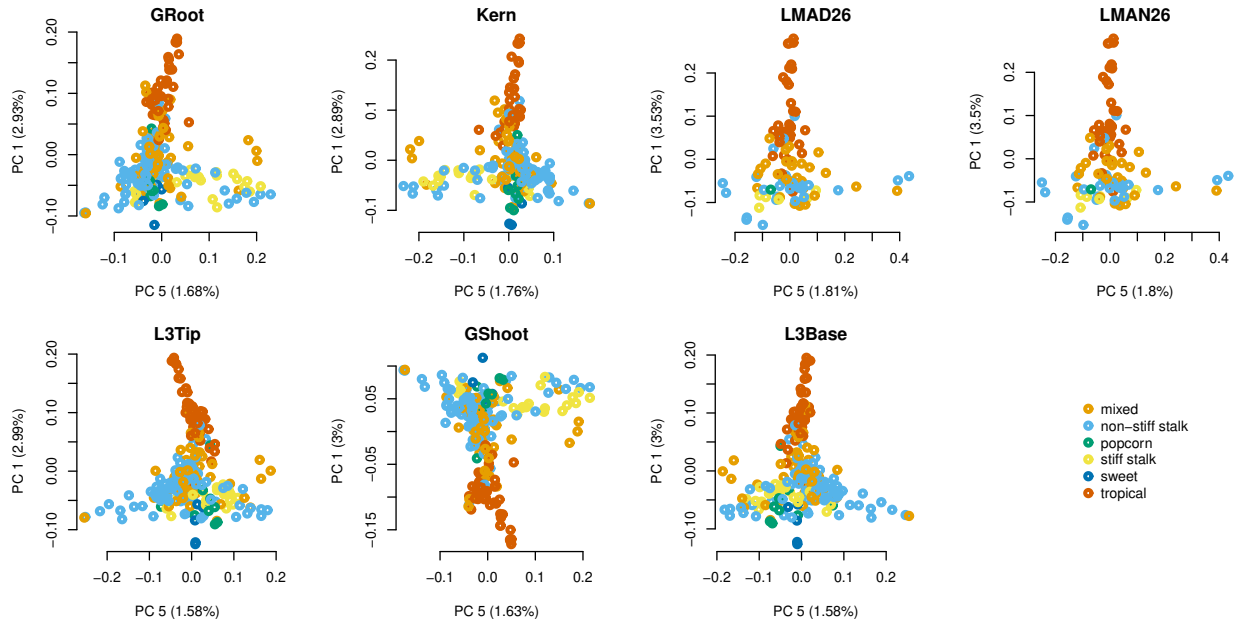

Figure S4: The first and fifth genetic PCs of genotypes in each tissue expression dataset. Each point represents one genotype, colored by subpopulation. The x axis is PC 5 and the Y axis is PC 1, labeled by the percentage of variation that each PC explains.

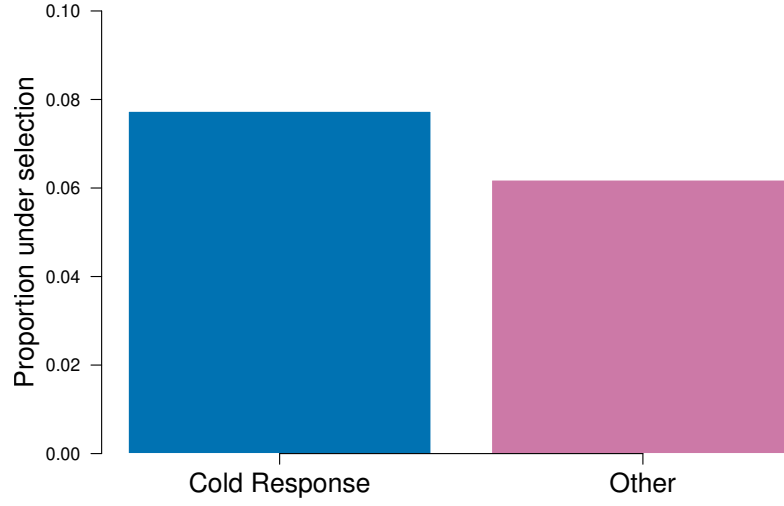

Figure S5: Enrichment for signals of selection in genes with differential response to cold treatment. The percentage of genes that show evidence of selection along PC 5 ( $p < 0.05$ ) in adult leaf expression during the day for genes that have expression change in cold and no change in response to cold. While there is a slight enrichment of signals of selection in cold-response genes, this enrichment is not significant after a Bonferroni correction for multiple testing ( $p = 0.09$ )

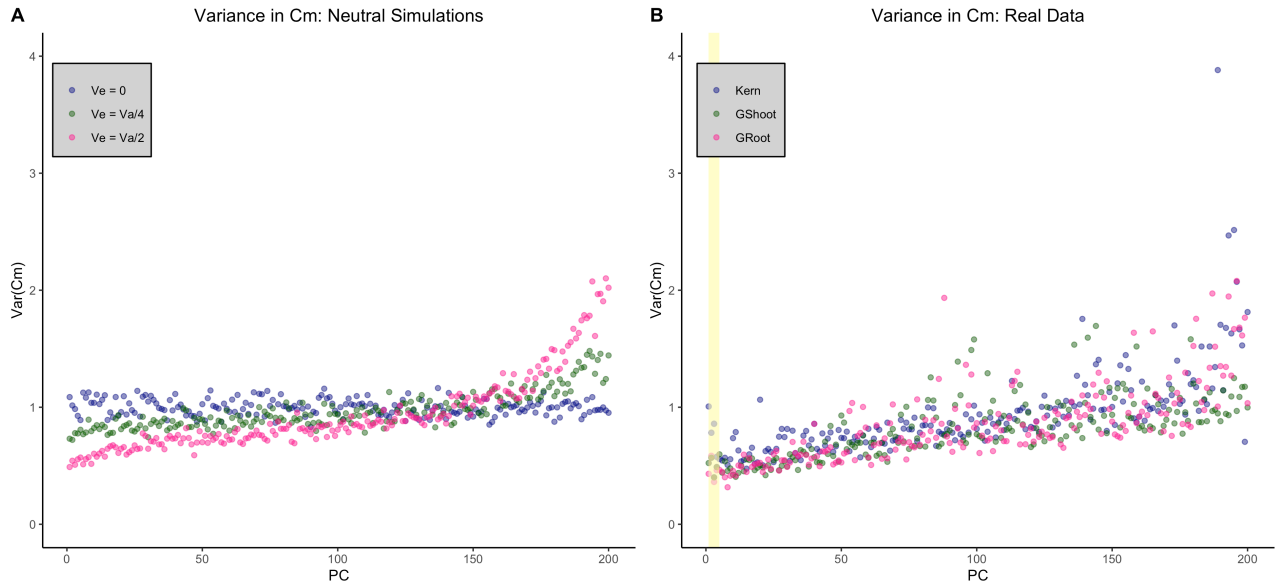

Figure S6: (A) Variance in  $C_m$  values for neutral simulations with different levels of environmental variance using the kinship matrix generated from the 207 Kernel lines. (B) Variance in  $C_m$  values for actual expression values for 3 different tissue types. The yellow box highlights the five 5 PCs along which expression divergence was tested.

| Tissue                    | PC 1  | PC 2  | PC 3  | PC 4  | PC 5  | Number of Genes | Up-Regulated Drought-Response Genes |
|---------------------------|-------|-------|-------|-------|-------|-----------------|-------------------------------------|
| Kernel                    | NA    | 0.689 | 0.051 | 0.124 | NA    | 2844            | 165                                 |
| Germinating shoot         | NA    | 0.181 | NA    | NA    | NA    | 3142            | 155                                 |
| Germinating root          | NA    | NA    | NA    | NA    | NA    | 2679            | 161                                 |
| Adult leaf night          | 0.379 | NA    | 1.000 | NA    | 0.077 | 3394            | 253                                 |
| Adult leaf day            | 0.337 | 0.915 | 0.104 | NA    | 0.319 | 3827            | 328                                 |
| 3 <sup>rd</sup> leaf tip  | NA    | 0.434 | NA    | 0.305 | NA    | 3513            | 254                                 |
| 3 <sup>rd</sup> leaf base | NA    | 0.485 | 1.000 | NA    | NA    | 3337            | 161                                 |

Table S7: Uncorrected p-values and sample sizes for chi-squared test for enrichment of signals of selection in up-regulated drought-response genes. P-values only shown for PC/tissue combinations with at least 1 significantly selected gene (FDR < 0.1).
